# Supplementary material for: Low Ki67/high ATM protein expression in malignant tumors predicts favorable prognosis in a retrospective study of early stage hormone receptor positive breast cancer
Source: PubMed Central journal article supplement (PMC5349875; doi:10.18632/oncotarget.12622), 2016-10-12
Supplement: oncotarget-07-85798-s001.pdf [file oncotarget-07-85798-s001.pdf]

# Appendix 1A: Consort diagram to demonstrate cohort selection

**A**

Initial Clinical Cohort (N=819)

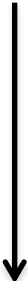

- Inclusion criteria:
- FFPE blocks of resected primary tumors available

TMA Cohort (N=532)

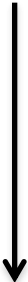

- Inclusion criteria:
- Stage I-III and underwent surgical lumpectomy or mastectomy
  - Successful biomarker staining for both ATM and Ki67
  - Confirmed ER/PR positivity on TMA spot
  - Confirmed HER2 negativity by IHC

Final Cohort (N=297)

Appendix 2: Low Ki67/high ATM expressions in malignant tumor predict favorable DSOS in ES-HPBC (size<4cm & LN=0 or LN=1-3).

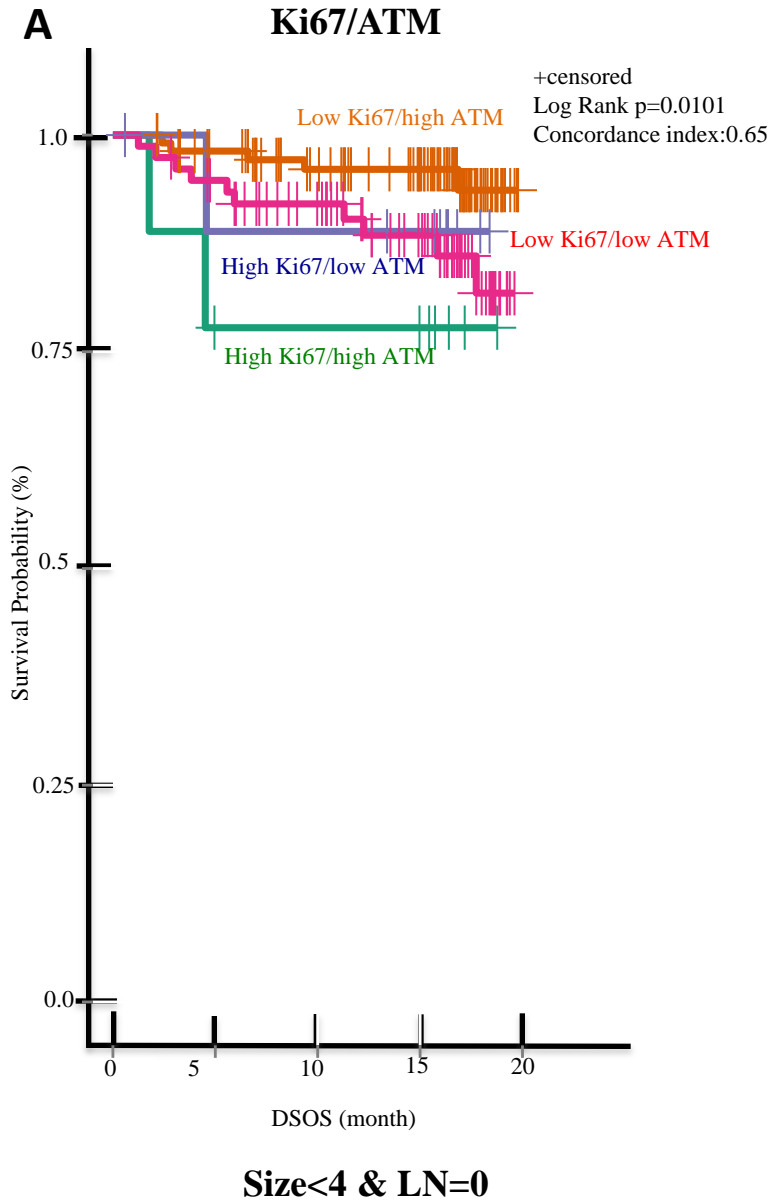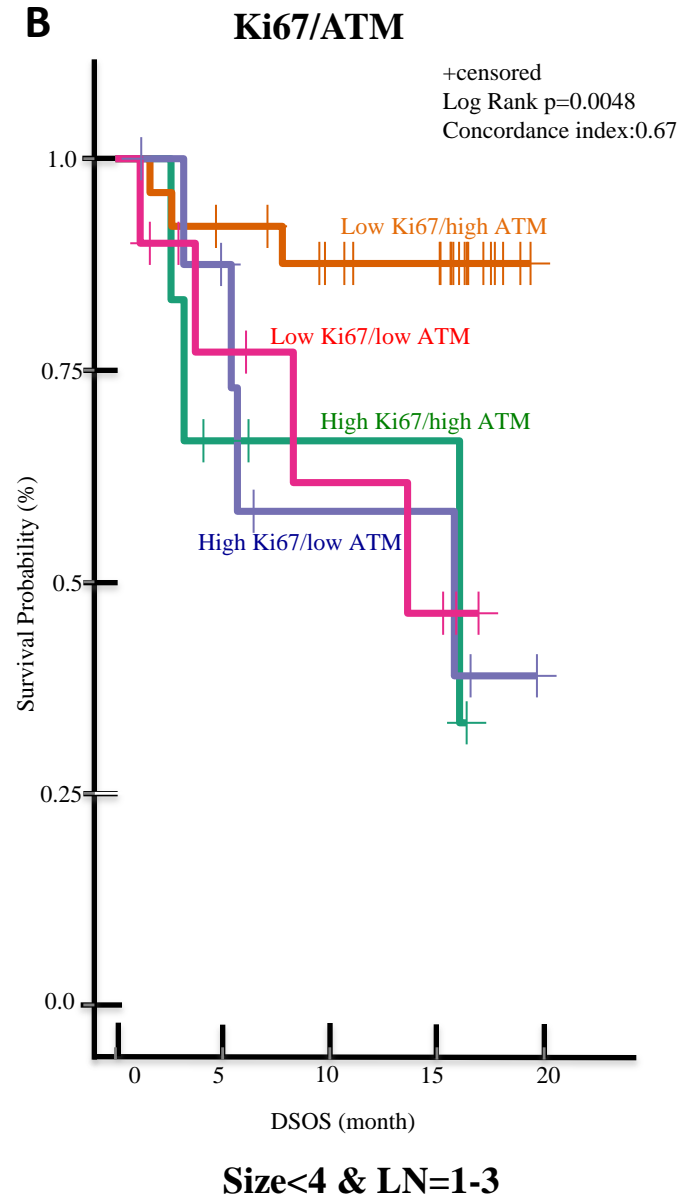

### Appendix 3: Single vs Combined biomarkers predict disease survival in a multivariate model in ES-HPBC (Stage I-III)

| <b>A</b> | <b>Variables</b>             | <b>p value</b> | <b>HR (95%CI)</b> |
|----------|------------------------------|----------------|-------------------|
|          | Low Ki67/high ATM vs others* | 0.01           | 0.33 (0.15-0.73)  |
|          | Tumor size (T1/2 vs T3/4)    | <0.0001        | 0.17 (0.05-0.58)  |
|          | LN status (- vs +)           | 0.07           | 0.50 (0.24-1.06)  |
|          | LVI (_- vs +)                | 0.26           | 0.65 (0.31-1.37)  |
|          | Grade (1/2 vs 3)             | 0.01           | 0.37 (0.18-0.76)  |
|          | Age (<65 vs >65)             | 0.06           | 0.51 (0.25-1.04)  |

\* Low Ki67/low ATM, High Ki67/high ATM and High Ki67/low ATM

| <b>B</b> | <b>Variables</b>          | <b>p value</b> | <b>HR (95%CI)</b> |
|----------|---------------------------|----------------|-------------------|
|          | Low Ki67 vs High Ki67     | 0.15           | 0.58 (0.87-1.22)  |
|          | Tumor size (T1/2 vs T3/4) | <0.0001        | 0.11 (0.03-0.35)  |
|          | LN status (- vs +)        | 0.13           | 0.56 (0.26-1.19)  |
|          | LVI (_- vs +)             | 0.23           | 0.63 (0.30-1.34)  |
|          | Grade (1/2 vs 3)          | 0.01           | 0.34 (0.16-0.72)  |
|          | Age (<65 vs >65)          | 0.06           | 0.50 (0.25-1.02)  |

| <b>C</b> | <b>Variables</b>          | <b>p value</b> | <b>HR (95%CI)</b> |
|----------|---------------------------|----------------|-------------------|
|          | High ATM vs low ATM       | 0.15           | 0.61 (0.30-1.20)  |
|          | Tumor size (T1/2 vs T3/4) | <0.0001        | 0.14 (0.04-0.49)  |
|          | LN status (- vs +)        | 0.07           | 0.50 (0.24-1.07)  |
|          | LVI (_- vs +)             | 0.28           | 0.66 (0.31-1.40)  |
|          | Grade (1/2 vs 3)          | <0.0001        | 0.31 (0.15-0.63)  |
|          | Age (<65 vs >65)          | 0.07           | 0.52 (0.26-1.06)  |
